# Supplementary material for: Novel wearable polyacrylonitrile/phase-change material sheath/core nano-fibers fabricated by coaxial electro-spinning
Source: Royal Society of Chemistry journal article supplement (doi:10.1039/c6ra00281a), 2016-01-01
Supplement: c6ra00281a1.pdf [file c6ra00281a1.pdf]

## Supporting Information

---

### **Novel Wearable Polyacrylonitrile/Phase-change Materials Sheath/Core Nano-fibers Fabricated by Coaxial Electro-spinning**

Yafan Wan<sup>1</sup>, Pucha Zhou<sup>2</sup>, Yaodong Liu<sup>2\*</sup>, Hongxiang Chen<sup>1</sup>

1. Wuhan University of Science and Technology, Chemical Engineering and Technology School, Wuhan, Hunan China 430081
  2. Institute of Coal Chemistry, CAS, Taiyuan, Shanxi China 030001
- \* Corresponding author: Yaodong Liu, E-mail: liuyd@sxicc.ac.cn

## Supporting Information

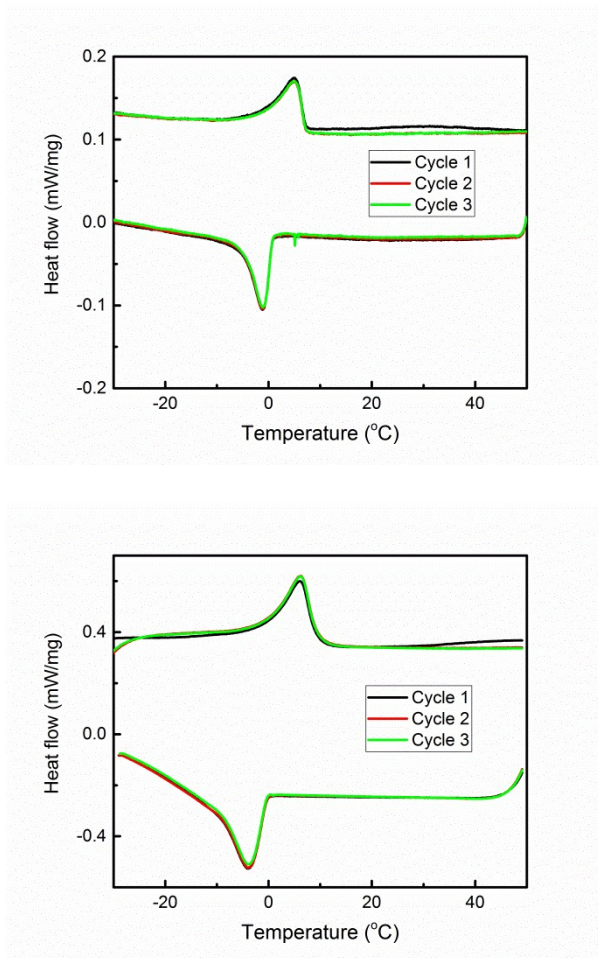

**Figure.S1** DSC Curves of PAN/paraffin oil sheath/core nano-fibers at heating/cooling rates of (A) 2 °C/min and (B) 10 °C/min, respectively. Fibers were initially cooled down to -36°C, then heated up to 50 °C, followed by cooled down to -30 °C. The heating/cooling cycle was repeated for another 2 times.

## Supporting Information

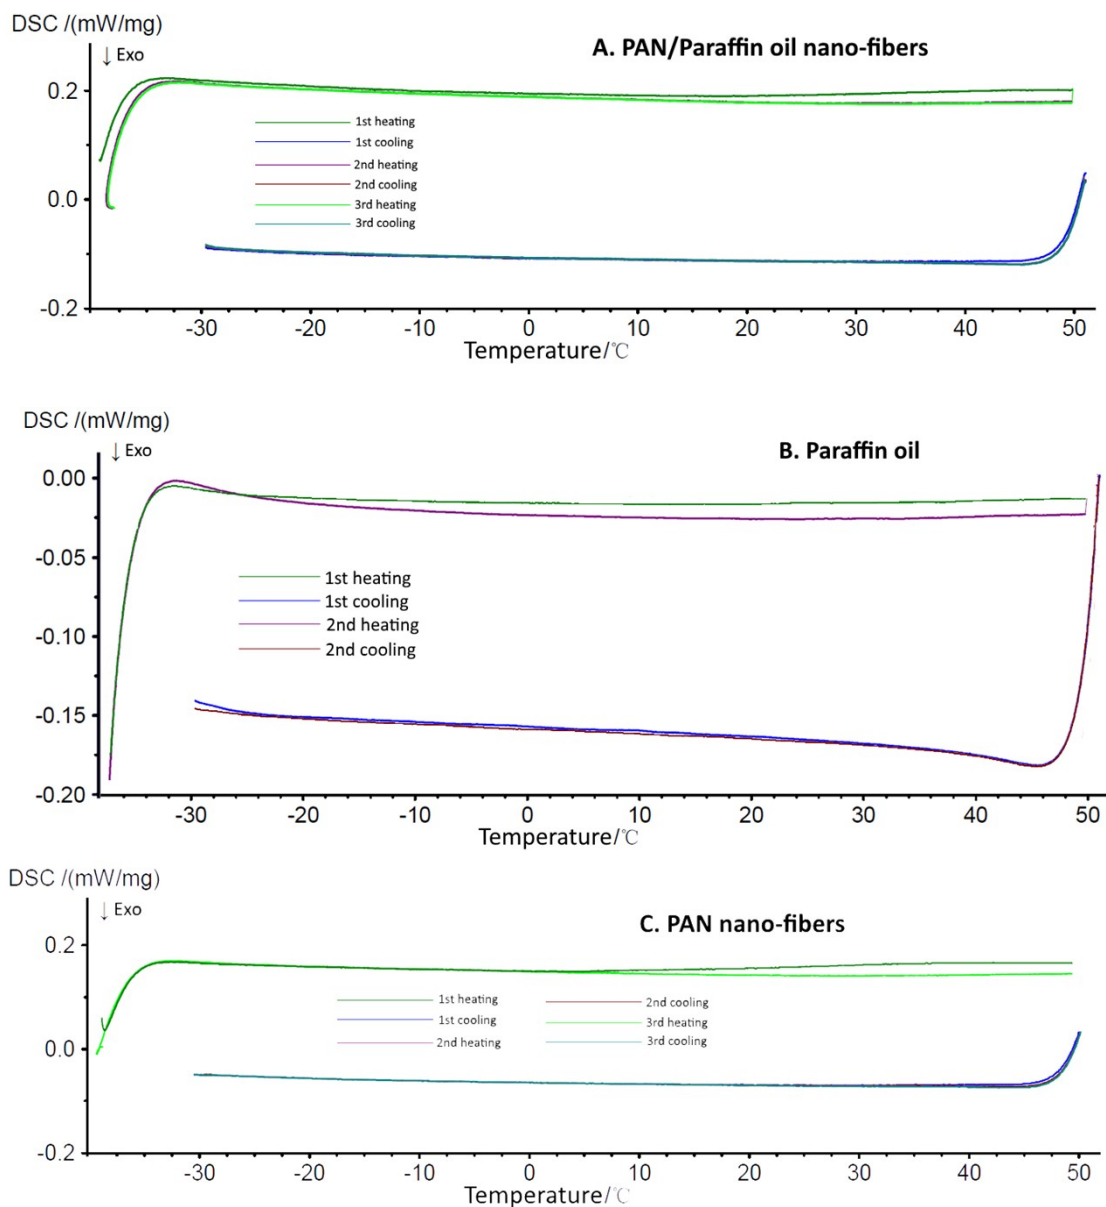

**Figure.S2** DSC Curves of (A) PAN/paraffin oil sheath/core nano-fibers, (B) paraffin oil, and (C) PAN nano-fibers. Fibers were initially cooled down to -36°C, then heated up to 50 °C at a heating rate of 5 °C/min, followed by cooled down to -30 °C at a cooling rate of 5 °C/min. The heating/cooling cycle was repeated for another 1 or 2 times.

PAN nano-fibers were prepared under the exactly same condition as PAN/paraffin oil nano-fibers. PAN nanofibers, PAN/paraffin oil nanofibers, and paraffin oil have no thermal transition in the temperature range between -30 to 50 °C.
